# Supplementary material
Source: PubMed Central journal article supplement (PMC1564263)

# **A** **Chromatograph**

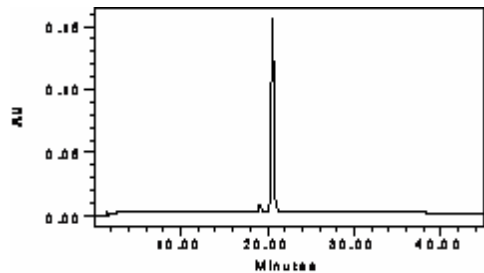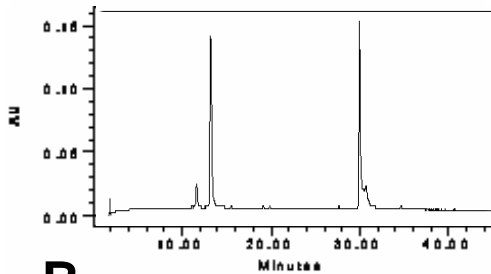

# **UV spectrum**

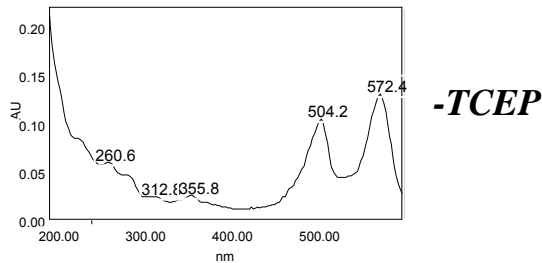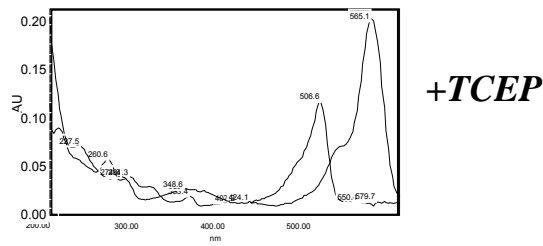

# **B** **Emission spectrum**

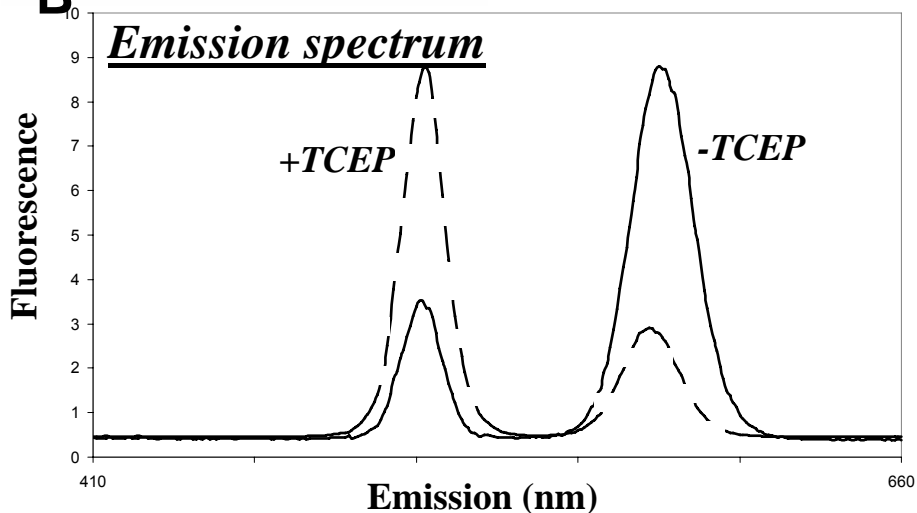

Supplement: pnas_0601455103_1.pdf [file pnas_0601455103_1.pdf]

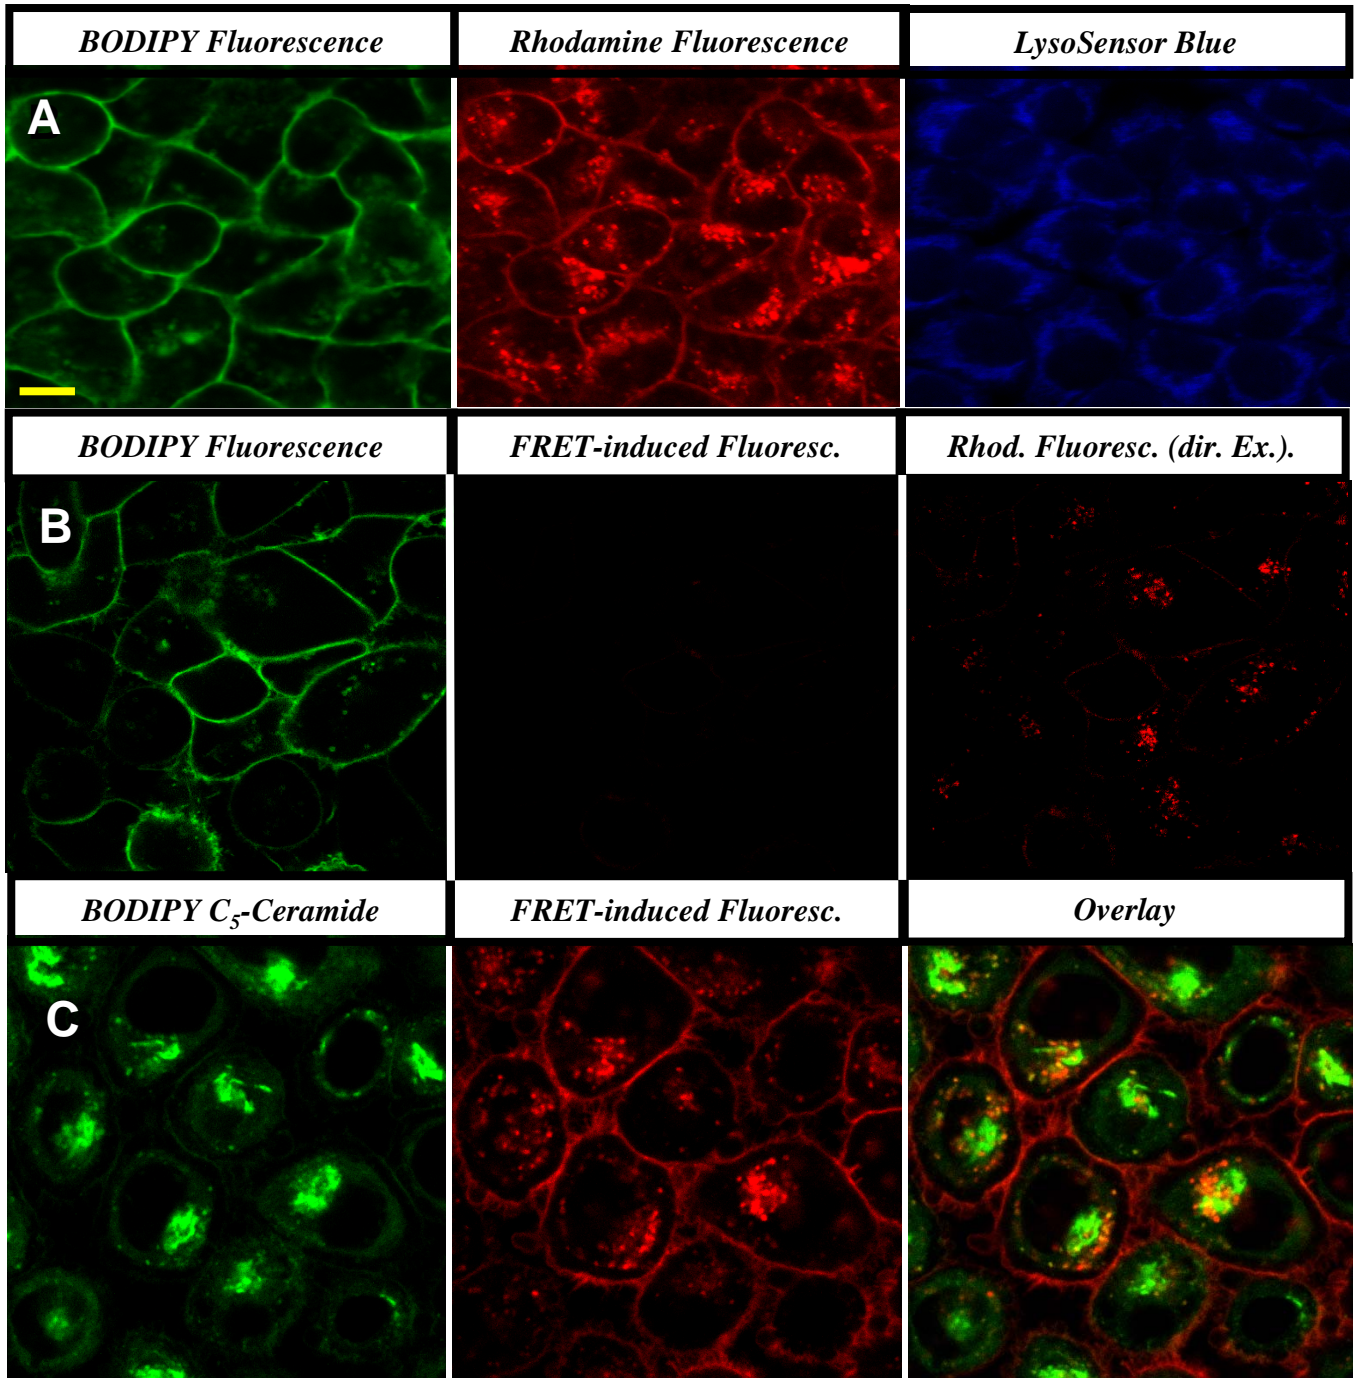

Supplement: pnas_0601455103_2.pdf [file pnas_0601455103_2.pdf]

*BODIPY Fluoresc.*

**A**

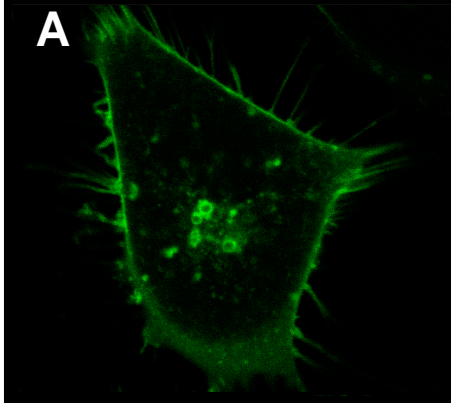

*Rhod. Fluoresc. (dir. ex.)*

**B**

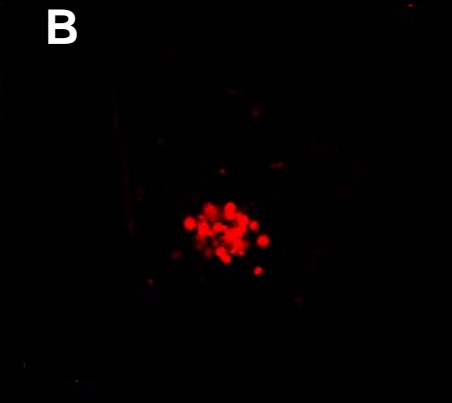

*Overlay*

**C**

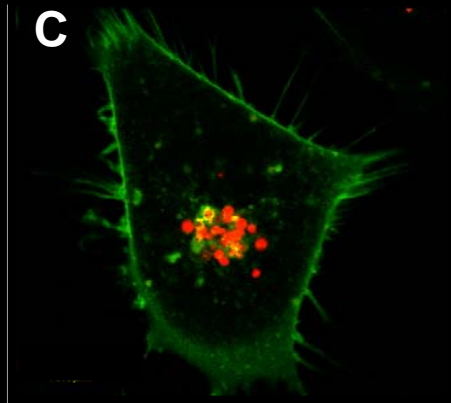

Supplement: pnas_0601455103_3.pdf [file pnas_0601455103_3.pdf]

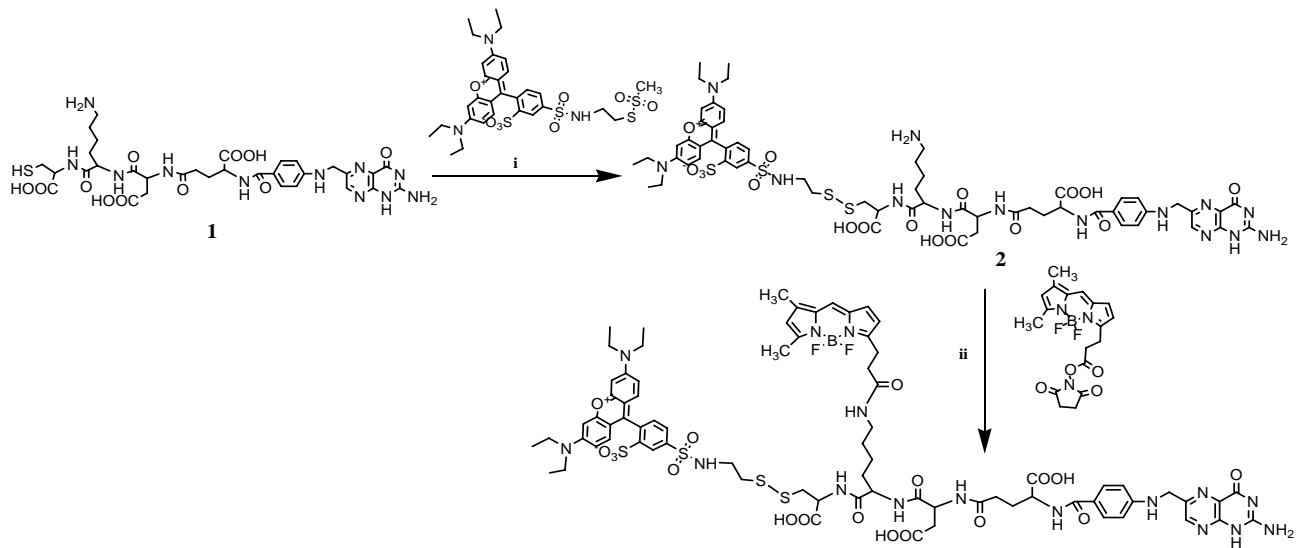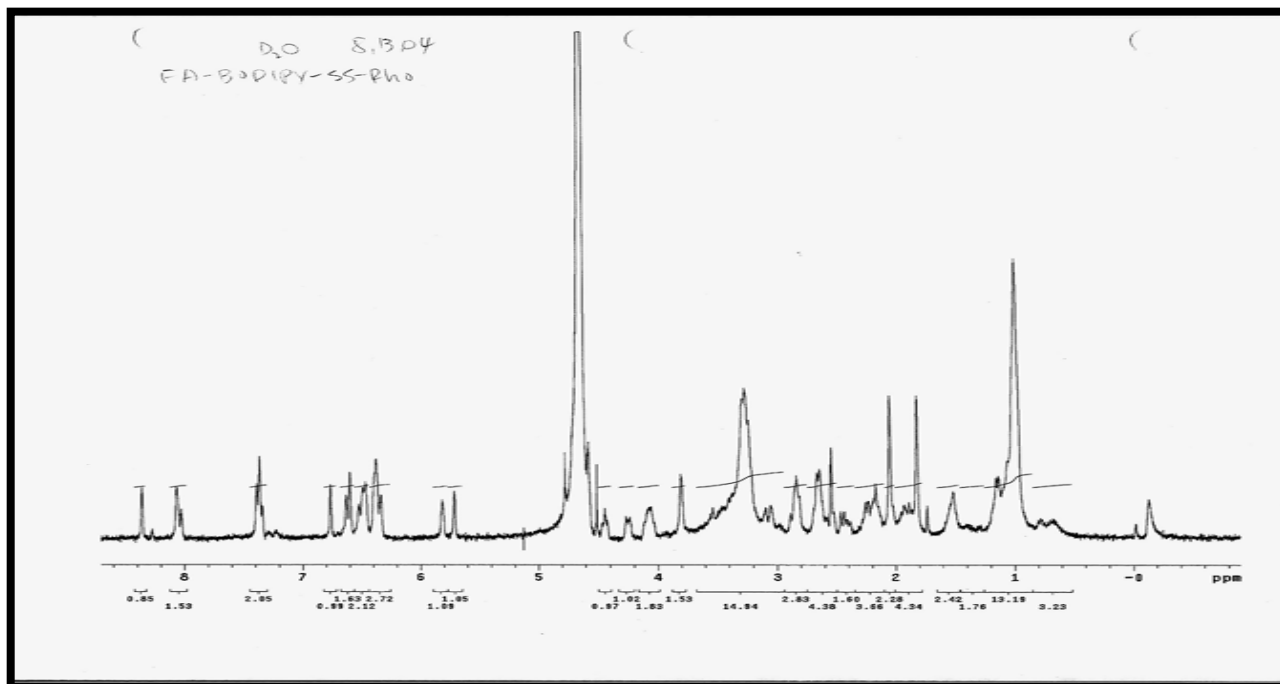

Supplement: pnas_0601455103_4.pdf [file pnas_0601455103_4.pdf]
